# Supplementary material for: Assessing the significance of course materials for graduate program admission
Source: Springer Nature journal article supplement (doi:10.1186/s40561-019-0109-y), 2019-12-01
Supplement: MOESM1 [file 17519946]

# Additional file 1

Survey Instrument: Important Graduate Program Applicant Criteria

Start of Block: Block 1

I am a decision maker for graduate program admission.

- Yes (1)
- No (2)

Skip To: End of Block If I am a decision maker for graduate program admission. = No

We would like to understand the qualities or experiences of candidates that make them most likely to be selected for a graduate program.

Please rank the following criteria from most important (top) to least important (bottom):

______ Evidence of exposure to empirical research or literature (1)

______ Graduation from an accredited undergraduate program (2)

______ Evidence of quality academic writing (3)

______ Demonstrated service to the community or community involvement (4)

______ Diversity and cultural awareness (5)

______ Practice in global thinking (6)

______ Demonstrated logical or mathematical reasoning (7)

______ Applied research experience (8)

______ Ranking of the undergraduate college or university (9)

______ Publication record of the professors in the students' majors (10)

______ Quality of academic materials in major classes (ex: textbooks, required readings, assessments) (11)

______ Major program student learning outcomes or competencies (12)

______ Academic rigor of major course syllabi (13)

What other criteria do you look for when selecting graduate program candidates?

________________________________________________________________

________________________________________________________________

________________________________________________________________

________________________________________________________________

________________________________________________________________

What elements or criteria would make you think the candidate may not be a good fit for your graduate program?

________________________________________________________________

________________________________________________________________

________________________________________________________________

________________________________________________________________

________________________________________________________________

End of Block: Default Question Block

Start of Block: Block 2

Display This Question:

If I am a decision maker for graduate program admission. = No

Thank you for your willingness to complete our survey.  At this time, we are looking to collect data from those who are decision makers for graduate program admission.

End of Block: Block 2
